# Supplementary material for: Psycho-Oncology: A Bibliometric Review of the 100 Most-Cited Articles
Source: MDPI journal article supplement (doi:10.3390/healthcare9081008), 2021-08-06
Supplement: s1 [file s1]

**Supplementary Material 1.** Scopus String Search.

1. psycho\* [TITLE-ABS-KEY](#)
2. psycho-\* [TITLE-ABS-KEY](#)
3. psychosocial [TITLE-ABS-KEY](#)
4. social [TITLE-ABS-KEY](#)
5. behavio\* [TITLE-ABS-KEY](#)
6. emotion\*
7. quality of life [TITLE-ABS-KEY](#)
8. bereavement [TITLE-ABS-KEY](#)
9. counselling [TITLE-ABS-KEY](#)
10. coping [TITLE-ABS-KEY](#)
11. stress [TITLE-ABS-KEY](#)
12. physician-patient relationship [TITLE-ABS-KEY](#)
13. wellbeing [TITLE-ABS-KEY](#)
14. well-being [TITLE-ABS-KEY](#)
15. oncolog\* [TITLE-ABS-KEY](#)
16. cancer [TITLE-ABS-KEY](#)
17. 1 OR 2 OR 3 OR 4 OR 5 OR 6 OR 7 OR 8 OR 9 OR 10 OR 11 OR 12 OR 13 OR 14
18. 15 OR 16
19. 17 AND 18
20. Limit 19 to:
  - English
  - Journal Articles (AND (LIMIT-TO (SRCTYPE, "j")))
  - 1970 on –
  - AND ( EXCLUDE ( SUBJAREA , "BIOC" ) OR EXCLUDE ( SUBJAREA , "PHAR" ) OR EXCLUDE ( SUBJAREA , "CHEM" ) ) AND ( EXCLUDE ( SUBJAREA , "AGRI" ) OR EXCLUDE ( SUBJAREA , "BUSI" ) OR EXCLUDE ( SUBJAREA , "CENG" ) OR EXCLUDE ( SUBJAREA , "COMP" ) OR EXCLUDE ( SUBJAREA , "ECON" ) ) AND ( EXCLUDE ( SUBJAREA , "ENGI" ) ) AND ( EXCLUDE ( SUBJAREA , "DENT" ) OR EXCLUDE ( SUBJAREA , "MATH" ) OR EXCLUDE ( SUBJAREA , "PHYS" ) OR EXCLUDE ( SUBJAREA , "VETE" ) OR EXCLUDE ( SUBJAREA , "ENER" ) OR EXCLUDE ( SUBJAREA , "EART" ) )

**Note:**

TITLE-ABS-KEY = Title, abstract or keyword

BIOC = Biochemistry, Genetics and Molecular Biology

PHAR = Pharmacology, Toxicology and Pharmaceutics

CHEM = Chemistry

AGRI = Agricultural and Biological Science

BUSI = Business, Management and Accounting

CENG = Chemical Engineering

COMP = Computer Science

ECON = Economics Econometrics and Finance

ENGI = Engineering

DENT = Dentistry  
MATH = Mathematics  
PHYS = Physics and Astronomy  
VETE = Veterinary  
ENER = Energy  
EART = Earth and Planetary Sciences

**Supplementary Material 2.** Comprehensive results from Scopus for the 100 most cited journal articles.

| Rank | Authors                     | Title                                                                                                                                                     | Year | Journal                                      |
|------|-----------------------------|-----------------------------------------------------------------------------------------------------------------------------------------------------------|------|----------------------------------------------|
| 1    | Aaronson N.K., et al. [69]  | The European Organization For Research And Treatment Of Cancer QLQ-C30: A Quality-Of-Life Instrument For Use In International Clinical Trials In Oncology | 1993 | Journal of the National Cancer Institute     |
| 2    | Brown K.W., & Ryan R.M. [8] | The Benefits Of Being Present: Mindfulness And Its Role In Psychological Well-Being                                                                       | 2003 | Journal of Personality and Social Psychology |
| 3    | Temel J.S., et al. [71]     | Early Palliative Care For Patients With Metastatic Non-Small-Cell Lung Cancer                                                                             | 2010 | New England Journal of Medicine              |
| 4    | Cella D.F., et al. [50]     | The Functional Assessment Of Cancer Therapy Scale: Development And Validation Of The General Measure                                                      | 1993 | Journal of Clinical Oncology                 |
| 5    | Cleeland C.S., et al. [72]  | Pain Assessment: Global Use Of The Brief Pain Inventory.                                                                                                  | 1994 | Annals of the Academy of Medicine, Singapore |
| 6    | Taylor S.E. [73]            | Adjustment To Threatening Events: A Theory Of Cognitive Adaptation                                                                                        | 1983 | American Psychologist                        |
| 7    | Spiegel D., et al. [49]     | Effect Of Psychosocial Treatment On Survival Of Patients With Metastatic Breast Cancer                                                                    | 1989 | The Lancet                                   |
| 8    | Zabora J., et al. [74]      | The Prevalence Of Psychological Distress By Cancer Site                                                                                                   | 2001 | Psycho-Oncology                              |
| 9    | Sanda M.G., et al. [75]     | Quality Of Life And Satisfaction With Outcome Among Prostate-Cancer Survivors                                                                             | 2008 | New England Journal of Medicine              |
| 10   | Wright A.A., et al. [76]    | Associations Between End-Of-Life Discussions, Patient Mental Health, Medical Care Near Death, And Caregiver Bereavement Adjustment                        | 2008 | Journal of the American Medical Association  |
| 11   | Derogatis L.R., et al. [77] | The Prevalence Of Psychiatric Disorders Among Cancer Patients                                                                                             | 1983 | Journal of the American Medical Association  |
| 12   | Carver C.S., et al. [78]    | How Coping Mediates The Effect Of Optimism On Distress: A Study Of Women With Early Stage Breast Cancer                                                   | 1993 | Journal of Personality and Social Psychology |
| 13   | Spitzer W.O., et al. [79]   | Measuring The Quality Of Life Of Cancer Patients. A Concise QL-Index For Use By Physicians                                                                | 1981 | Journal of Chronic Diseases                  |
| 14   | Holmes M.D., et al. [80]    | Physical Activity And Survival After Breast Cancer Diagnosis                                                                                              | 2005 | Journal of the American Medical Association  |

|    |                             |                                                                                                                                                                              |      |                                             |
|----|-----------------------------|------------------------------------------------------------------------------------------------------------------------------------------------------------------------------|------|---------------------------------------------|
| 15 | Murthy V.H., et al. [81]    | Participation In Cancer Clinical Trials: Race-, Sex-, And Age-Based Disparities                                                                                              | 2004 | Journal of the American Medical Association |
| 16 | Yellen S.B., et al. [59]    | Measuring Fatigue And Other Anemia-Related Symptoms With The Functional Assessment Of Cancer Therapy (FACT) Measurement System                                               | 1997 | Journal of Pain and Symptom Management      |
| 17 | Serlin R.C., et al. [82]    | When Is Cancer Pain Mild, Moderate Or Severe? Grading Pain Severity By Its Interference With Function                                                                        | 1995 | Pain                                        |
| 18 | Portenoy R.K., et al. [54]  | The Memorial Symptom Assessment Scale: An Instrument For The Evaluation Of Symptom Prevalence, Characteristics And Distress                                                  | 1994 | European Journal of Cancer                  |
| 19 | Wei J.T., et al. [83]       | Development And Validation Of The Expanded Prostate Cancer Index Composite (EPIC) For Comprehensive Assessment Of Health-Related Quality Of Life In Men With Prostate Cancer | 2000 | Urology                                     |
| 20 | Cassileth B.R., et al. [84] | Information And Participation Preferences Among Cancer Patients                                                                                                              | 1980 | Annals of Internal Medicine                 |
| 21 | Degner L.F., et al. [85]    | Information Needs And Decisional Preferences In Women With Breast Cancer                                                                                                     | 1997 | Journal of the American Medical Association |
| 22 | Bakitas M., et al.          | Effects Of A Palliative Care Intervention On Clinical Outcomes In Patients With Advanced Cancer: The Project ENABLE II Randomized Controlled Trial                           | 2009 | Journal of the American Medical Association |
| 23 | Peterman A.H., et al. [86]  | Measuring Spiritual Well-Being In People With Cancer: The Functional Assessment Of Chronic Illness Therapy - Spiritual Well-Being Scale (FACIT-Sp)                           | 2002 | Annals of Behavioral Medicine               |
| 24 | Litwin M.S., et al. [52]    | Quality-Of-Life Outcomes In Men Treated For Localized Prostate Cancer                                                                                                        | 1995 | Journal of the American Medical Association |
| 25 | Fawzy F.I., et al. [87]     | Malignant Melanoma: Effects Of An Early Structured Psychiatric Intervention, Coping, And Affective State On Recurrence And Survival 6 Years Later                            | 1993 | Archives of General Psychiatry              |
| 26 | Schipper H., et al. [88]    | Measuring The Quality Of Life Of Cancer Patients: The Functional Living Index-Cancer: Development And Validation                                                             | 1984 | Journal of Clinical Oncology                |
| 27 | Zech D.F.J., et al. [89]    | Validation Of World Health Organization Guidelines For Cancer Pain Relief: A 10-Year Prospective Study                                                                       | 1995 | Pain                                        |
| 28 | Wolfe J., et al. [90]       | Symptoms And Suffering At The End Of Life In Children With Cancer                                                                                                            | 2000 | New England Journal of Medicine             |
| 29 | Shacham S. [91]             | A Shortened Version Of The Profile Of Mood States                                                                                                                            | 1983 | Journal of Personality Assessment           |
| 30 | Curt G.A., et al.           | Impact Of Cancer-Related Fatigue On The Lives Of Patients: New Findings From The Fatigue Coalition                                                                           | 2000 | Oncologist                                  |

|    |                                   |                                                                                                                                                                                   |      |                                             |
|----|-----------------------------------|-----------------------------------------------------------------------------------------------------------------------------------------------------------------------------------|------|---------------------------------------------|
| 31 | Degner L.F., & Sloan J.A. [60]    | Decision Making During Serious Illness: What Role Do Patients Really Want To Play?                                                                                                | 1992 | Journal of Clinical Epidemiology            |
| 32 | Speck R.M., et al. [92]           | An Update Of Controlled Physical Activity Trials In Cancer Survivors: A Systematic Review And Meta-Analysis                                                                       | 2010 | Journal of Cancer Survivorship              |
| 33 | Foley K.M.                        | The Treatment Of Cancer Pain                                                                                                                                                      | 1985 | New England Journal of Medicine             |
| 34 | Demark-Wahnefried W., et al. [93] | Riding The Crest Of The Teachable Moment: Promoting Long-Term Health After The Diagnosis Of Cancer                                                                                | 2005 | Journal of Clinical Oncology                |
| 35 | Burgess C., et al. [94]           | Depression And Anxiety In Women With Early Breast Cancer: Five Year Observational Cohort Study                                                                                    | 2005 | British Medical Journal                     |
| 36 | Calman K.C. [95]                  | Quality Of Life In Cancer Patients--An Hypothesis.                                                                                                                                | 1984 | Journal of Medical Ethics                   |
| 37 | Bower J.E., et al. [96]           | Fatigue In Breast Cancer Survivors: Occurrence, Correlates, And Impact On Quality Of Life                                                                                         | 2000 | Journal of Clinical Oncology                |
| 38 | Reiche E.M.V., et al. [97]        | Stress, Depression, The Immune System, And Cancer                                                                                                                                 | 2004 | Lancet Oncology                             |
| 39 | Zimmermann C., et al. [98]        | Early Palliative Care For Patients With Advanced Cancer: A Cluster-Randomised Controlled Trial                                                                                    | 2014 | The Lancet                                  |
| 40 | Rock C.L., et al. [99]            | Nutrition And Physical Activity Guidelines For Cancer Survivors                                                                                                                   | 2012 | CA: Cancer Journal for Clinicians           |
| 41 | Spiegel D., et al. [47]           | Group Support For Patients With Metastatic Cancer: A Randomized Prospective Outcome Study                                                                                         | 1981 | Archives of General Psychiatry              |
| 42 | Meyer T.J., & Mark M.M. [100]     | Effects Of Psychosocial Interventions With Adult Cancer Patients: A Meta-Analysis Of Randomized Experiments                                                                       | 1995 | Health Psychology                           |
| 43 | Breitbart W., et al. [101]        | Depression, Hopelessness, And Desire For Hastened Death In Terminally Ill Patients With Cancer                                                                                    | 2000 | Journal of the American Medical Association |
| 44 | Antoni M.H., et al. [102]         | Cognitive-Behavioral Stress Management Intervention Decreases The Prevalence Of Depression And Enhances Benefit Finding Among Women Under Treatment For Early-Stage Breast Cancer | 2001 | Health Psychology                           |
| 45 | Detmar S.B., et al. [103]         | Health-Related Quality-Of-Life Assessments And Patient-Physician Communication: A Randomized Controlled Trial                                                                     | 2002 | Journal of the American Medical Association |
| 46 | De Haes M., et al.                | Measuring Psychological And Physical Distress In Cancer Patients: Structure And Application Of The Rotterdam Symptom Checklist                                                    | 1990 | British Journal of Cancer                   |
| 47 | McNeely M.L., et al. [104]        | Effects Of Exercise On Breast Cancer Patients And Survivors: A Systematic Review And Meta-Analysis                                                                                | 2006 | Canadian Medical Association Journal        |

|    |                                        |                                                                                                                                                                                                         |      |                                                   |
|----|----------------------------------------|---------------------------------------------------------------------------------------------------------------------------------------------------------------------------------------------------------|------|---------------------------------------------------|
| 48 | Glimelius B., et al. [105]             | Randomized Comparison Between<br>Chemotherapy Plus Best Supportive Care<br>With Best Supportive Care In Advanced<br>Gastric Cancer                                                                      | 1997 | Annals of Oncology                                |
| 49 | Goodwin P.J., et al. [106]             | The Effect Of Group Psychosocial<br>Support On Survival In Metastatic Breast<br>Cancer                                                                                                                  | 2001 | New England Journal<br>of Medicine                |
| 50 | Lerman C., et al. [107]                | BRCA1 Testing In Families With<br>Hereditary Breast-Ovarian Cancer: A<br>Prospective Study Of Patient Decision<br>Making And Outcomes                                                                   | 1996 | Journal of the<br>American Medical<br>Association |
| 51 | Vogelzang N.J., et al. [57]            | Patient, Caregiver, And Oncologist<br>Perceptions Of Cancer-Related Fatigue:<br>Results Of A Tripart Assessment Survey<br>A Randomized, Wait-List Controlled<br>Clinical Trial: The Effect Of A         | 1997 | Seminars in<br>Hematology                         |
| 52 | Specia M., et al. [108]                | Mindfulness Meditation-Based Stress<br>Reduction Program On Mood And<br>Symptoms Of Stress In Cancer<br>Outpatients                                                                                     | 2000 | Psychosomatic<br>Medicine                         |
| 53 | Molassiotis A., et al. [109]           | Use Of Complementary And Alternative<br>Medicine In Cancer Patients: A European<br>Survey                                                                                                               | 2005 | Annals of Oncology                                |
| 54 | Litwin M.S., et al. [53]               | The UCLA Prostate Cancer Index:<br>Development, Reliability, And Validity<br>Of A Health-Related Quality Of Life<br>Measure                                                                             | 1998 | Medical Care                                      |
| 55 | Taylor S.E., et al. [110]              | Attributions, Beliefs About Control, And<br>Adjustment To Breast Cancer<br>Efficacy Of A Cancer Research UK<br>Communication Skills Training Model<br>For Oncologists: A Randomised<br>Controlled Trial | 1984 | Journal of Personality<br>and Social Psychology   |
| 56 | Fallowfield L., et al. [111]           | Posttraumatic Growth Following Breast<br>Cancer: A Controlled Comparison Study                                                                                                                          | 2002 | Lancet                                            |
| 57 | Cordova M.J., et al. [61]              | Factors Influencing Death At Home In<br>Terminally Ill Patients With Cancer:<br>Systematic Review                                                                                                       | 2001 | Health Psychology                                 |
| 58 | Gomes B., & Higginson I.J.<br>[112]    | Attitudes To Chemotherapy: Comparing<br>Views Of Patients With Cancer With<br>Those Of Doctors, Nurses, And General<br>Public                                                                           | 2006 | British Medical Journal                           |
| 59 | Slevin M.L., et al. [113]              | The Effect Of Message Framing On<br>Breast Self-Examination Attitudes,<br>Intentions, And Behavior                                                                                                      | 1990 | British Medical Journal                           |
| 60 | Meyerowitz B.E., & Chaiken<br>S. [114] | Randomised Comparison Of<br>Combination Chemotherapy Plus<br>Supportive Care With Supportive Care<br>Alone In Patients With Metastatic<br>Colorectal Cancer                                             | 1987 | Journal of Personality<br>and Social Psychology   |
| 61 | Scheithauer W., et al. [115]           |                                                                                                                                                                                                         | 1993 | British Medical Journal                           |

|    |                                   |                                                                                                                                                 |      |                                             |
|----|-----------------------------------|-------------------------------------------------------------------------------------------------------------------------------------------------|------|---------------------------------------------|
| 62 | Fallowfield L.J., et al. [116]    | Psychological Outcomes Of Different Treatment Policies In Women With Early Breast Cancer Outside A Clinical Trial                               | 1990 | British Medical Journal                     |
| 63 | Rutten L.J.F., et al.[117]        | Information Needs And Sources Of Information Among Cancer Patients: A Systematic Review Of Research (1980-2003)                                 | 2005 | Patient Education and Counseling            |
| 64 | Leydon G.M., et al. [118]         | Cancer Patients' Information Needs And Information Seeking Behaviour: In Depth Interview Study                                                  | 2000 | British Medical Journal                     |
| 65 | McCorkle R., & Young K. [119]     | Development Of A Symptom Distress Scale.                                                                                                        | 1978 | Cancer Nursing                              |
| 66 | Riley V. [120]                    | Psychoneuroendocrine Influences On Immunocompetence And Neoplasia                                                                               | 1981 | Science                                     |
| 67 | Portenoy R.K., et al. [55]        | Breakthrough Pain: Characteristics And Impact In Patients With Cancer Pain                                                                      | 1999 | Pain                                        |
| 68 | Brewer N.T., & Fazekas K.I. [121] | Predictors Of HPV Vaccine Acceptability: A Theory-Informed, Systematic Review                                                                   | 2007 | Preventive Medicine                         |
| 69 | Kreuter M.W., et al. [122]        | Achieving Cultural Appropriateness In Health Promotion Programs: Targeted And Tailored Approaches                                               | 2003 | Health Education and Behavior               |
| 70 | Miller G.E., et al. [123]         | Chronic Psychological Stress And The Regulation Of Pro-Inflammatory Cytokines: A Glucocorticoid-Resistance Model                                | 2002 | Health Psychology                           |
| 71 | Hudson M.M., et al. [124]         | Health Status Of Adult Long-Term Survivors Of Childhood Cancer: A Report From The Childhood Cancer Survivor Study                               | 2003 | Journal of the American Medical Association |
| 72 | Steineck G., et al. [125]         | Quality Of Life After Radical Prostatectomy Or Watchful Waiting                                                                                 | 2002 | New England Journal of Medicine             |
| 73 | Mulhern R.K., et al. [126]        | Late Neurocognitive Sequelae In Survivors Of Brain Tumours In Childhood                                                                         | 2004 | Lancet Oncology                             |
| 74 | Grunfeld E., et al. [127]         | Family Caregiver Burden: Results Of A Longitudinal Study Of Breast Cancer Patients And Their Principal Caregivers                               | 2004 | Canadian Medical Association Journal        |
| 75 | Ghezzi, P., et al. [128]          | Impact Of Follow-Up Testing On Survival And Health-Related Quality Of Life In Breast Cancer Patients: A Multicenter Randomized Controlled Trial | 1994 | Journal of the American Medical Association |
| 76 | Zhang B., et al. [129]            | Health Care Costs In The Last Week Of Life Associations With End-Of-Life Conversations                                                          | 2009 | Archives of Internal Medicine               |
| 77 | Basch E., et al. [130]            | Symptom Monitoring With Patient-Reported Outcomes During Routine Cancer Treatment: A Randomized Controlled Trial                                | 2016 | Journal of Clinical Oncology                |
| 78 | Hann D., et al. [131]             | Measurement Of Depressive Symptoms In Cancer Patients: Evaluation Of The                                                                        | 1999 | Journal of Psychosomatic Research           |

|    |                                       |                                                                                                                                                                           |      |                                             |
|----|---------------------------------------|---------------------------------------------------------------------------------------------------------------------------------------------------------------------------|------|---------------------------------------------|
|    |                                       | Center For Epidemiological Studies Depression Scale (CES-D)                                                                                                               |      |                                             |
| 79 | Greer S., et al. [132]                | Psychological Response To Breast Cancer: Effect On Outcome                                                                                                                | 1979 | The Lancet                                  |
| 80 | Brady M.J., et al. [56]               | A Case For Including Spirituality In Quality Of Life Measurement In Oncology                                                                                              | 1999 | Psycho-Oncology                             |
| 81 | Jacobsen P.B., et al. [133]           | Screening For Psychologic Distress In Ambulatory Cancer Patients: A Multicenter Evaluation Of The Distress Thermometer                                                    | 2005 | Cancer                                      |
| 82 | Blanchard C.M., et al. [134]          | Cancer Survivors' Adherence To Lifestyle Behavior Recommendations And Associations With Health-Related Quality Of Life: Results From The American Cancer Society's SCS-II | 2008 | Journal of Clinical Oncology                |
| 83 | Teunissen S.C.C.M., et al. [135]      | Symptom Prevalence In Patients With Incurable Cancer: A Systematic Review                                                                                                 | 2007 | Journal of Pain and Symptom Management      |
| 84 | Gøtzsche P.C., & Jørgensen K.J. [136] | Screening For Breast Cancer With Mammography                                                                                                                              | 2013 | Cochrane Database of Systematic Reviews     |
| 85 | Cella D. [51]                         | The Functional Assessment Of Cancer Therapy-Anemia (FACT-An) Scale: A New Tool For The Assessment Of Outcomes In Cancer Anemia And Fatigue                                | 1997 | Seminars in Hematology                      |
| 86 | Watson M., et al. [137]               | Influence Of Psychological Response On Survival In Breast Cancer: A Population-Based Cohort Study                                                                         | 1999 | Lancet                                      |
| 87 | Lawlor P.G., et al. [138]             | Occurrence, Causes, And Outcome Of Delirium In Patients With Advanced Cancer: A Prospective Study                                                                         | 2002 | Archives of Internal Medicine               |
| 88 | Burstein H.J., et al. [139]           | Use Of Alternative Medicine By Women With Early-Stage Breast Cancer                                                                                                       | 1999 | New England Journal of Medicine             |
| 89 | Moorey S., et al.[140]                | The Factor Structure And Factor Stability Of The Hospital Anxiety And Depression Scale In Patients With Cancer                                                            | 1991 | British Journal of Psychiatry               |
| 90 | McClain C.S., et al. [141]            | Effect Of Spiritual Well-Being On End-Of-Life Despair In Terminally-Ill Cancer Patients                                                                                   | 2003 | Lancet                                      |
| 91 | Fawzy F.I., et al. [142]              | A Structured Psychiatric Intervention For Cancer Patients: I. Changes Over Time In Methods Of Coping And Affective Disturbance                                            | 1990 | Archives of General Psychiatry              |
| 92 | Satin J.R., et al. [143]              | Depression As A Predictor Of Disease Progression And Mortality In Cancer Patients: A Meta-Analysis                                                                        | 2009 | Cancer                                      |
| 93 | Novack D.H., et al.[144]              | Changes In Physicians' Attitudes Toward Telling The Cancer Patient                                                                                                        | 1979 | Journal of the American Medical Association |
| 94 | Sears S.R., et al. [145]              | The Yellow Brick Road And The Emerald City: Benefit Finding, Positive Reappraisal Coping, And Posttraumatic                                                               | 2003 | Health Psychology                           |

|     |                                    |                                                                                                                          |      |                                               |
|-----|------------------------------------|--------------------------------------------------------------------------------------------------------------------------|------|-----------------------------------------------|
|     |                                    | Growth In Women With Early-Stage Breast Cancer                                                                           |      |                                               |
| 95  | Piper B.F., et al.                 | The Revised Piper Fatigue Scale: Psychometric Evaluation In Women With Breast Cancer.                                    | 1998 | Oncology Nursing Forum                        |
| 96  | Spiegel D., & Giese-Davis J. [146] | Depression And Cancer: Mechanisms And Disease Progression                                                                | 2003 | Biological Psychiatry                         |
| 97  | Helgeson V.S., & Cohen S. [147]    | Social Support And Adjustment To Cancer: Reconciling Descriptive, Correlational, And Intervention Research               | 1996 | Health Psychology                             |
| 98  | McNeil B.J., et al. [148]          | Speech And Survival: Tradeoffs Between Quality And Quantity Of Life In Laryngeal Cancer                                  | 1981 | New England Journal of Medicine               |
| 99  | Stanton A.L., et al. [149]         | Emotionally Expressive Coping Predicts Psychological And Physical Adjustment To Breast Cancer                            | 2000 | Journal of Consulting and Clinical Psychology |
| 100 | Doyle C., et al. [150]             | Nutrition And Physical Activity During And After Cancer Treatment: An American Cancer Society Guide For Informed Choices | 2006 | CA: Cancer Journal for Clinicians             |

**Supplementary Material 3.** Preferred Reporting Items for Systematic reviews and Meta-Analyses extension for Scoping Reviews (PRISMA-ScR) Checklist.

| Section                   | Item | Prisma-ScR Checklist Item                                                                                                                                                                                                                                                 | Reported on Page #                            |
|---------------------------|------|---------------------------------------------------------------------------------------------------------------------------------------------------------------------------------------------------------------------------------------------------------------------------|-----------------------------------------------|
| <b>Title</b>              |      |                                                                                                                                                                                                                                                                           |                                               |
| Title                     | 1    | Identify the report as a scoping review.                                                                                                                                                                                                                                  | Identified as a bibliometric review on page 1 |
| <b>Abstract</b>           |      |                                                                                                                                                                                                                                                                           |                                               |
| Structured summary        | 2    | Provide a structured summary that includes (as applicable): background, objectives, eligibility criteria, sources of evidence, charting methods, results, and conclusions that relate to the review questions and objectives.                                             | 1                                             |
| <b>Introduction</b>       |      |                                                                                                                                                                                                                                                                           |                                               |
| Rationale                 | 3    | Describe the rationale for the review in the context of what is already known. Explain why the review questions/objectives lend themselves to a scoping review approach.                                                                                                  | 2–3                                           |
| Objectives                | 4    | Provide an explicit statement of the questions and objectives being addressed with reference to their key elements (e.g., population or participants, concepts, and context) or other relevant key elements used to conceptualize the review questions and/or objectives. | 2–3                                           |
| <b>Methods</b>            |      |                                                                                                                                                                                                                                                                           |                                               |
| Protocol and registration | 5    | Indicate whether a review protocol exists; state if and where it can be accessed (e.g., a Web address); and if available, provide registration information, including the registration number.                                                                            | 3                                             |



| Section                                               | Item | Prisma-Scr Checklist Item                                                                                                                                                                                                                                                                                  | Reported on Page #       |
|-------------------------------------------------------|------|------------------------------------------------------------------------------------------------------------------------------------------------------------------------------------------------------------------------------------------------------------------------------------------------------------|--------------------------|
| Eligibility criteria                                  | 6    | Specify characteristics of the sources of evidence used as eligibility criteria (e.g., years considered, language, and publication status), and provide a rationale.                                                                                                                                       | 3–5                      |
| Information sources*                                  | 7    | Describe all information sources in the search (e.g., databases with dates of coverage and contact with authors to identify additional sources), as well as the date the most recent search was executed.                                                                                                  | 3                        |
| Search                                                | 8    | Present the full electronic search strategy for at least 1 database, including any limits used, such that it could be repeated.                                                                                                                                                                            | 3–4                      |
| Selection of sources of evidence†                     | 9    | State the process for selecting sources of evidence (i.e., screening and eligibility) included in the scoping review.                                                                                                                                                                                      | 3–5                      |
| Data charting process‡                                | 10   | Describe the methods of charting data from the included sources of evidence (e.g., calibrated forms or forms that have been tested by the team before their use, and whether data charting was done independently or in duplicate) and any processes for obtaining and confirming data from investigators. | 4                        |
| Data items                                            | 11   | List and define all variables for which data were sought and any assumptions and simplifications made.                                                                                                                                                                                                     | 5                        |
| Critical appraisal of individual sources of evidence§ | 12   | If done, provide a rationale for conducting a critical appraisal of included sources of evidence; describe the methods used and how this information was used in any data synthesis (if appropriate).                                                                                                      | N/A                      |
| Synthesis of results                                  | 13   | Describe the methods of handling and summarizing the data that were charted.                                                                                                                                                                                                                               | 5–6                      |
| <b>Results</b>                                        |      |                                                                                                                                                                                                                                                                                                            |                          |
| Selection of sources of evidence                      | 14   | Give numbers of sources of evidence screened, assessed for eligibility, and included in the review, with reasons for exclusions at each stage, ideally using a flow diagram.                                                                                                                               | 6                        |
| Characteristics of sources of evidence                | 15   | For each source of evidence, present characteristics for which data were charted and provide the citations.                                                                                                                                                                                                | 6                        |
| Critical appraisal within sources of evidence         | 16   | If done, present data on critical appraisal of included sources of evidence (see item 12).                                                                                                                                                                                                                 | N/A                      |
| Results of individual sources of evidence             | 17   | For each included source of evidence, present the relevant data that were charted that relate to the review questions and objectives.                                                                                                                                                                      | Supplementary material 2 |
| Synthesis of results                                  | 18   | Summarize and/or present the charting results as they relate to the review questions and objectives.                                                                                                                                                                                                       | 6–9                      |
| <b>Discussion</b>                                     |      |                                                                                                                                                                                                                                                                                                            |                          |

| Section             | Item | Prisma-Scr Checklist Item                                                                                                                                                                       | Reported on Page # |
|---------------------|------|-------------------------------------------------------------------------------------------------------------------------------------------------------------------------------------------------|--------------------|
| Summary of evidence | 19   | Summarize the main results (including an overview of concepts, themes, and types of evidence available), link to the review questions and objectives, and consider the relevance to key groups. | 10–11              |
| Limitations         | 20   | Discuss the limitations of the scoping review process.                                                                                                                                          | 12–13              |
| Conclusions         | 21   | Provide a general interpretation of the results with respect to the review questions and objectives, as well as potential implications and/or next steps.                                       | 14–15              |
| <b>Funding</b>      |      |                                                                                                                                                                                                 |                    |
| Funding             | 22   | Describe sources of funding for the included sources of evidence, as well as sources of funding for the scoping review. Describe the role of the funders of the scoping review.                 | 16                 |

JBI = Joanna Briggs Institute; PRISMA-ScR = Preferred Reporting Items for Systematic reviews and Meta-Analyses extension for Scoping Reviews \* Where *sources of evidence* (see second footnote) are compiled from, such as bibliographic databases, social media platforms, and Web sites. † A more inclusive/heterogeneous term used to account for the different types of evidence or data sources (e.g., quantitative and/or qualitative research, expert opinion, and policy documents) that may be eligible in a scoping review as opposed to only studies. This is not to be confused with *information sources* (see first footnote). ‡ The frameworks by Arksey and O'Malley (6) and Levac and colleagues (7) and the JBI guidance (4, 5) refer to the process of data extraction in a scoping review as data charting. § The process of systematically examining research evidence to assess its validity, results, and relevance before using it to inform a decision. This term is used for items 12 and 19 instead of "risk of bias" (which is more applicable to systematic reviews of interventions) to include and acknowledge the various sources of evidence that may be used in a scoping review (e.g., quantitative and/or qualitative research, expert opinion, and policy document).

From: Tricco AC, Lillie E, Zarin W, O'Brien KK, Colquhoun H, Levac D, et al. PRISMA Extension for Scoping Reviews (PRISMA-ScR): Checklist and Explanation. *Ann Intern Med*. 2018; 169:467–473. doi: 10.7326/M18-0850.
